# Supplementary material
Source: publisher figshare collection journal article supplement (https://acs.figshare.com/ndownloader/files/14570885)
Supplement: Supplementary file 1 [file 14570885]

## Sheet: Raw Data
	CAS-nSF-IP				ROHF MOs
	S = 5/2	S = 3/2	S = 1/2		104A	0.289186
	-4826.76	-4826.77	-4826.76		105A	0.289187
	-4826.76	-4826.77	-4826.76		106A	0.301397
	-4826.69	-4826.73	-4826.74		107A	0.302584
	-4826.68	-4826.73	-4826.74		108A	0.373571
	-4826.68	-4826.72	-4826.74		109A	0.373573
	-4826.68	-4826.72	-4826.74
	RAS(h)-nSF-IP
	S = 5/2	S = 3/2	S = 1/2
	-4826.84	-4826.85	-4826.85
	-4826.84	-4826.85	-4826.85
	-4826.79	-4826.82	-4826.83
	-4826.79	-4826.82	-4826.83
	-4826.79	-4826.82	-4826.83
	-4826.79	-4826.82	-4826.83
	RAS(p)-nSF-IP
	S = 5/2	S = 3/2	S = 1/2
	-4826.78	-4826.78	-4826.78
	-4826.78	-4826.78	-4826.78
	-4826.7	-4826.74	-4826.76
	-4826.7	-4826.74	-4826.76
	-4826.69	-4826.74	-4826.76
	-4826.69	-4826.74	-4826.76
	RAS(h,p)-nSF-IP
	S = 5/2	S = 3/2	S = 1/2
	-4826.85	-4826.85	-4826.85
	-4826.85	-4826.85	-4826.85
	-4826.8	-4826.82	-4826.84
	-4826.8	-4826.82	-4826.84
	-4826.8	-4826.82	-4826.83
	-4826.8	-4826.82	-4826.83
	RAS(S)-nSF-IP
	S = 5/2	S = 3/2	S = 1/2
	-4826.94	-4826.95
	-4826.94	-4826.95
	-4826.88	-4826.91
	-4826.88	-4826.91
	-4826.87	-4826.9
	-4826.87	-4826.9

## Sheet: Parameter Extraction
	CAS-nSF-IP				ZGP Parameter Extraction (Analytical)							Reconstruction of Energy Levels
	S = 5/2	S = 3/2	S = 1/2			CAS	RAS(h)	RAS(p)	RAS(h,p)	RAS(S)			CAS			CAS + h			CAS + p			1x			S
	-4826.76	-4826.77	-4826.76		DE(5/2-, 5/2+)	0.0830657	0.0506386	0.0817246	0.0531274	0.0681728			2.5	1.5	0.5	2.5	1.5	0.5	2.5	1.5	0.5	2.5	1.5	0.5	2.5	1.5	0.5
	-4826.76	-4826.77	-4826.76		t	0.0415328	0.0253193	0.0408623	0.0265637	0.0340864		t	0.0415328	0.0415328	0.0415328	0.0253193	0.0253193	0.0253193	0.0408623	0.0408623	0.0408623	0.0265637	0.0265637	0.0265637	0.0340864	0.0340864	0.0340864
	-4826.69	-4826.73	-4826.74		DE(5/2-, 3/2-)	0.00776962	0.00423482	0.00814152	0.00470098	0.008056		J	-0.00864556	-0.00864556	-0.00864556	-0.00506983	-0.00506983	-0.00506983	-0.00870491	-0.00870491	-0.00870491	-0.00542222	-0.00542222	-0.00542222	-0.00776725	-0.00776725	-0.00776725
	-4826.68	-4826.73	-4826.74		J	-0.00864556	-0.00506983	-0.00870491	-0.00542222	-0.00776725		ZGP -	-0.0415328	-0.0493025	-0.0484265	-0.0253193	-0.0295541	-0.0287191	-0.0408623	-0.0490038	-0.0484404	-0.0265637	-0.0312647	-0.0305434	-0.0340864	-0.0421424	-0.0424311
	-4826.68	-4826.72	-4826.74									ZGP +	0.0415328	0.00607466	-0.020738	0.0253193	0.00420494	-0.0118396	0.0408623	0.00547925	-0.0211989	0.0265637	0.00415359	-0.0128343	0.0340864	0.00330613	-0.0197069
	-4826.68	-4826.72	-4826.74		AH-ZGP Parameter Extraction (Analytical)							t	0.0415328	0.0415328	0.0415328	0.0253193	0.0253193	0.0253193	0.0408623	0.0408623	0.0408623	0.0265637	0.0265637	0.0265637	0.0340864	0.0340864	0.0340864
						CAS	RAS(h)	RAS(p)	RAS(h,p)	RAS(S)		J	-0.00624063	-0.00624063	-0.00624063	-0.00403253	-0.00403253	-0.00403253	-0.0063159	-0.0063159	-0.0063159	-0.00425124	-0.00425124	-0.00425124	-0.00616592	-0.00616592	-0.00616592
	RAS(h)-nSF-IP				DE(5/2-, 5/2+)	0.0830657	0.0506386	0.0817246	0.0531274	0.0681728		δ	0.0979969	0.0979969	0.0979969	0.100973	0.100973	0.100973	0.0948647	0.0948647	0.0948647	0.0955648	0.0955648	0.0955648	0.111785	0.111785	0.111785
	S = 5/2	S = 3/2	S = 1/2		t	0.0415328	0.0253193	0.0408623	0.0265637	0.0340864		AH-ZGP -	-0.0415328	-0.0493027	-0.0500081	-0.0253193	-0.0295543	-0.0292214	-0.0408623	-0.0490036	-0.0500233	-0.0265637	-0.0312647	-0.0311497	-0.0340864	-0.0421424	-0.0433095
	-4826.84	-4826.85	-4826.85		Calc. DE(5/2-, 3/2+)	-0.0373474	-0.0271813	-0.0359632	-0.0277122	-0.0327835		AH-ZGP +	0.0415328	-0.00418546	-0.0285866	0.0253193	0.00186199	-0.0139941	0.0408623	-0.00489911	-0.0290897	0.0265637	0.0011485	-0.0155108	0.0340864	-0.00130289	-0.0236869
	-4826.84	-4826.85	-4826.85		Calc. DE(5/2-, 3/2-)	0.00776984	0.00423502	0.00814135	0.00470098	0.00805602
	-4826.79	-4826.82	-4826.83		True DE(5/2-, 3/2+)	-0.0373474	-0.0271805	-0.0359632	-0.0277122	-0.0327835		Graphing Reconstructed Energy Levels
	-4826.79	-4826.82	-4826.83		True DE(5/2-, 3/2-)	0.00776962	0.00423482	0.00814152	0.00470098	0.008056			CAS
	-4826.79	-4826.82	-4826.83		DDE	2.24059e-07	9.36626e-07	1.97358e-07	1.6455e-08	1.64239e-08			S=4.5			S = 3.5			S = 2.5
	-4826.79	-4826.82	-4826.83		J	-0.00624063	-0.00403253	-0.0063159	-0.00425124	-0.00616592			1	2		2.25	3.25		3.5	4.5
					δ	0.0979969	0.100973	0.0948647	0.0955648	0.111785		Ab Initio -	0	0		-0.00776962	-0.00776962		-0.00447764	-0.00447764
	RAS(p)-nSF-IP											Ab Initio +	0.0830657	0.0830657		0.0373474	0.0373474		0.0150749	0.0150749
	S = 5/2	S = 3/2	S = 1/2									Ab Initio NH -	0.0743908	0.0743908		0.0304419	0.0304419		0.0199781	0.0199781
	-4826.78	-4826.78	-4826.78									Ab Initio NH +	0.0753158	0.0753158		0.0309661	0.0309661		0.0204341	0.0204341
	-4826.78	-4826.78	-4826.78									ZGP -	0	0		-0.00776962	-0.00776962		-0.00689368	-0.00689368
	-4826.7	-4826.74	-4826.76									ZGP +	0.0830657	0.0830657		0.0476075	0.0476075		0.0207949	0.0207949
	-4826.7	-4826.74	-4826.76									AH-ZGP -	0	0		-0.00776984	-0.00776984		-0.00847527	-0.00847527
	-4826.69	-4826.74	-4826.76									AH-ZGP +	0.0830657	0.0830657		0.0373474	0.0373474		0.0129463	0.0129463
	-4826.69	-4826.74	-4826.76										CAS + h
													S=4.5			S = 3.5			S = 2.5
	RAS(h,p)-nSF-IP												1	2		2.25	3.25		3.5	4.5
	S = 5/2	S = 3/2	S = 1/2									Ab Initio -	0	0		-0.00423482	-0.00423482		-0.00195934	-0.00195934
	-4826.85	-4826.85	-4826.85									Ab Initio +	0.0506386	0.0506386		0.0271805	0.0271805		0.0123946	0.0123946
	-4826.85	-4826.85	-4826.85									Ab Initio NH -	0.0493677	0.0493677		0.0272177	0.0272177		0.0176569	0.0176569
	-4826.8	-4826.82	-4826.84									Ab Initio NH +	0.0507907	0.0507907		0.0276822	0.0276822		0.0182676	0.0182676
	-4826.8	-4826.82	-4826.84									ZGP -	0	0		-0.00423482	-0.00423482		-0.00339981	-0.00339981
	-4826.8	-4826.82	-4826.83									ZGP +	0.0506386	0.0506386		0.0295242	0.0295242		0.0134797	0.0134797
	-4826.8	-4826.82	-4826.83									AH-ZGP -	0	0		-0.00423502	-0.00423502		-0.00390217	-0.00390217
												AH-ZGP +	0.0506386	0.0506386		0.0271813	0.0271813		0.0113252	0.0113252
	RAS(S)-nSF-IP												CAS + p
	S = 5/2	S = 3/2	S = 1/2										S=4.5			S = 3.5			S = 2.5
	-4826.94	-4826.95											1	2		2.25	3.25		3.5	4.5
	-4826.94	-4826.95										Ab Initio -	0	0		-0.00814152	-0.00814152		-0.00513083	-0.00513083
	-4826.88	-4826.91										Ab Initio +	0.0817246	0.0817246		0.0359632	0.0359632		0.0138327	0.0138327
	-4826.88	-4826.91										Ab Initio NH -	0.0732762	0.0732762		0.0329472	0.0329472		0.0191892	0.0191892
	-4826.87	-4826.9										Ab Initio NH +	0.0741687	0.0741687		0.0335154	0.0335154		0.0195802	0.0195802
	-4826.87	-4826.9										ZGP -	0	0		-0.00814152	-0.00814152		-0.00757812	-0.00757812
												ZGP +	0.0817246	0.0817246		0.0463415	0.0463415		0.0196634	0.0196634
												AH-ZGP -	0	0		-0.00814135	-0.00814135		-0.00916097	-0.00916097
												AH-ZGP +	0.0817246	0.0817246		0.0359632	0.0359632		0.0117726	0.0117726
													1x
													S=4.5			S = 3.5			S = 2.5
													1	2		2.25	3.25		3.5	4.5
												Ab Initio -	0	0		-0.00470098	-0.00470098		-0.00244983	-0.00244983
												Ab Initio +	0.0531274	0.0531274		0.0277122	0.0277122		0.0121994	0.0121994
												Ab Initio NH -	0.0512256	0.0512256		0.0286692	0.0286692		0.0172643	0.0172643
												Ab Initio NH +	0.0526148	0.0526148		0.0291839	0.0291839		0.0178464	0.0178464
												ZGP -	0	0		-0.00470098	-0.00470098		-0.00397974	-0.00397974
												ZGP +	0.0531274	0.0531274		0.0307173	0.0307173		0.0137294	0.0137294
												AH-ZGP -	0	0		-0.00470098	-0.00470098		-0.004586	-0.004586
												AH-ZGP +	0.0531274	0.0531274		0.0277122	0.0277122		0.0110529	0.0110529
													S
													S=4.5			S = 3.5			S = 2.5
													1	2		2.25	3.25		3.5	4.5
												Ab Initio -	0	0		-0.008056	-0.008056
												Ab Initio +	0.0681728	0.0681728		0.0327835	0.0327835
												Ab Initio NH -	0.0614775	0.0614775		0.0274642	0.0274642
												Ab Initio NH +	0.062629	0.062629		0.0281321	0.0281321
												ZGP -	0	0		-0.008056	-0.008056		-0.00834475	-0.00834475
												ZGP +	0.0681728	0.0681728		0.0373925	0.0373925		0.0143795	0.0143795
												AH-ZGP -	0	0		-0.00805602	-0.00805602		-0.00922313	-0.00922313
												AH-ZGP +	0.0681728	0.0681728		0.0327835	0.0327835		0.0103995	0.0103995

## Sheet: Summary
	Conversions			Reference Values						Our Parameters								% Errors Predicting S=0.5 States (Relative To Energy Gap)
	219475	cm^-1/hartree										CAS	RAS(h)	RAS(p)	RAS(h,p)	RAS(S)			CAS	RAS(h)	RAS(p)	RAS(h,p)
				Guihery (Original)						ZGP	t	9115.42	5556.95	8968.25	5830.07	7481.11		ZGP -	0.539579	0.735177	0.476978	0.624493
						CAS	CAS(5,6)+DDCI	CAS(9,8)+DDCI			J	-1897.48	-1112.7	-1910.51	-1190.04	-1704.72		ZGP +	0.379441	0.0875472	0.421516	0.125412
				ZGP	t	9737	7972	8239		AH-ZGP	t	9115.42	5556.95	8968.25	5830.07	7481.11		Average ZGP	0.45951	0.411362	0.449247	0.374953
					J	-2636.6	-2249.6	-2513			J'	-1369.66	-885.039	-1386.18	-933.04	-1353.26		AH-ZGP -	0.892799	0.991572	0.785476	0.871966
				AH-ZGP	t	9737	7972	8239			δ	21507.9	22161	20820.4	20974.1	24534.1		AH-ZGP +	0.141202	0.0862777	0.148929	0.0939833
					J'	-1007	-1293	-1533										Average AH-ZGP	0.517	0.538925	0.467203	0.482975
					δ	15523	19433	21296
																		% Errors Predicting S=0.5 States (Relative To Full Spectrum)
				% Error Predicting S=0.5 State (Relative to Spectrum, Original)															CAS	RAS(h)	RAS(p)	RAS(h,p)
						CAS	CAS(5,6)+DDCI	CAS(9,8)+DDCI										ZGP -	0.026598	0.0262507	0.0272326	0.0264559
				ZGP -		0.165685	0.107292	0.119093										ZGP +	0.0629713	0.0197749	0.0648821	0.0264569
				ZGP +		0.0386798	0.0311854	0.0374301										Average ZGP	0.0447847	0.0230128	0.0460574	0.0264564
				Average		0.102182	0.0692388	0.0782613										AH-ZGP -	0.0440097	0.0354057	0.0448461	0.0369398
				AH-ZGP -		0.0122287	0.013225	0.0257009										AH-ZGP +	0.0234336	0.0194881	0.0229241	0.0198267
				AH-ZGP +		5.84891e-05	0.000173981	0.000388089										Average AH-ZGP	0.0337216	0.0274469	0.0338851	0.0283832
				Average		0.00614359	0.0066995	0.0130445
																		% Errors Relative to (h,p) Gaps (Full Spectrum)
				Guihery (High-Spin Only Extraction)															CAS	RAS(h)	RAS(p)
						CAS	CAS(5,6)+DDCI	CAS(9,8)+DDCI										S-, S+	0.517709	0.0430387	0.494518
				ZGP	t	9737	7972	8239										S-, Q-	0.0530646	0.00806108	0.0594957
					J	-1830.67	-2010.13	-2347.73										S-, Q+	0.166616	0.00919417	0.14268
				AH-ZGP	t	9737	7972	8239										S-, D-	0.0350659	0.00848184	0.0463613
					J'	-1154.14	-1621.5	-2000.05										S-, D+	0.0497234	0.00337483	0.0282432
					δ	16468.4	24739.2	31531.4										Average	0.164436	0.0144301	0.15426
				% Error Predicting S=0.5 State (Relative to Spectrum, HS-Only)
						CAS	CAS(5,6)+DDCI	CAS(9,8)+DDCI
				ZGP -		0.165761	0.054984	0.0853664
				ZGP +		0.0387567	0.0211228	0.00370389
				Average		0.102259	0.0380534	0.0445351
				AH-ZGP -		0.0353956	0.0670164	0.094189
				AH-ZGP +		0.0160695	0.034255	0.0419903
				Average		0.0257325	0.0506357	0.0680897

## Sheet: Parameter Extraction (Guihery)
	CAS(5,6)CI				ZGP Parameter Extraction (Analytical)					Reconstruction of Energy Levels
	S = 5/2	S = 3/2	S = 1/2			CAS	CAS(5,6)+DDCI	CAS(9,8)+DDCI			CAS			CAS(5,6)+DDCI			CAS(9,8)+DDCI
	-9737	-11068	-10345		DE(5/2-, 5/2+)	19474	15944	16478			2.5	1.5	0.5	2.5	1.5	0.5	2.5	1.5	0.5
	-9737	-11068	-10345		t	9737	7972	8239		t	9737	9737	9737	7972	7972	7972	8239	8239	8239
	9737	-2115	-6496		DE(5/2-, 3/2-)	1331	2368	3123		J	-2637	-2637	-2637	-2010.13	-2010.13	-2010.13	-2347.73	-2347.73	-2347.73
	9737	-2115	-6496		J	-1830.67	-2010.13	-2347.73		ZGP -	-9737	-13083.8	-13793.7	-7972	-10340	-10697.9	-8239	-11362	-12137.3
					J (Paper)	-2636.6	-2249.6	-2513	<- matches paper (extracted using averages)	ZGP +	9737	-101.167	-7302.33	7972	289.333	-5383.2	8239	-376.667	-6644.6
	CAS(5,6)+DDCI									t	9737	9737	9737	7972	7972	7972	8239	8239	8239	<- From Paper
	S = 5/2	S = 3/2	S = 1/2		AH-ZGP Parameter Extraction (Analytical)					J	-2636.6	-2636.6	-2636.6	-2249.6	-2249.6	-2249.6	-2513	-2513	-2513
	-7972	-10340	-9691		`	CAS	CAS(5,6)+DDCI	CAS(9,8)+DDCI		ZGP -	-9737	-13082.8	-13792.1	-7972	-10938.7	-11655.7	-8239	-11775.2	-12798.3
	-7972	-10340	-9691		DE(5/2-, 5/2+)	19474	15944	16478		ZGP +	9737	-100.167	-7300.73	7972	-309.333	-6341.07	8239	-789.833	-7305.67
	7972	-908	-5770		t	9737	7972	8239		t	9737	9737	9737	7972	7972	7972	8239	8239	8239
	7972	-908	-5770		Calc. DE(5/2-, 3/2+)	-7622	-7064	-7036		J	-1154.14	-1154.14	-1154.14	-1621.5	-1621.5	-1621.5	-2000.05	-2000.05	-2000.05
					Calc. DE(5/2-, 3/2-)	1331	2368	3123		δ	16468.4	16468.4	16468.4	24739.2	24739.2	24739.2	31531.4	31531.4	31531.4
	CAS(9,8)+DDCI				True DE(5/2-, 3/2+)	-7622	-7064	-7036		AH-ZGP -	-9737	-11068	-11081.4	-7972	-10340	-10918.2	-8239	-11362	-12310.2
	S = 5/2	S = 3/2	S = 1/2		True DE(5/2-, 3/2-)	1331	2368	3123		AH-ZGP +	9737	-2115	-6830.33	7972	-908.001	-6397.28	8239	-1203	-7395.05
	-8239	-11362	-10464		DDE	6.7577e-09	1.01029e-08	7.39537e-09		t	9737	9737	9737	7972	7972	7972	8239	8239	8239	<- From Paper
	-8239	-11362	-10464		J	-1154.14	-1621.5	-2000.05		J	-1007	-1007	-1007	-1293	-1293	-1293	-1533	-1533	-1533
	8239	-1203	-6572		δ	16468.4	24739.2	31531.4		δ	15523	15523	15523	19433	19433	19433	21296	21296	21296
	8239	-1203	-6572		Calc. DE(5/2-, 3/2+)	-7622	-7064	-7036		AH-ZGP -	-9737	-10750.2	-10599.4	-7972	-9679.02	-9933.18	-8239	-10453.9	-10967.8
					Calc. DE(5/2-, 1/2+)	-3241	-2202	-1667		AH-ZGP +	9737	-2123.84	-6497.22	7972	-910.812	-5766.81	8239	-1202.55	-6564.39
					True DE(5/2-, 3/2+)	-7622	-7064	-7036
					True DE(5/2-, 1/2+)	-3241	-2202	-1667		Graphing Reconstructed Energy Levels
				`	DDE	1.08178e-08	1.70606e-08	3.66511e-08			CAS(5,6)CI
					J	-1009.06	-1295.62	-1536.65	<- near-matching for paper		S=4.5			S = 3.5			S = 2.5
					δ	15556.8	19479.4	21344.7			1	2		2.25	3.25		3.5	4.5
					J	-1007	-1293	-1533	<- taken directly from paper	Ab Initio -	0	0		-1331	-1331		-608	-608
					δ	15523	19433	21296		Ab Initio +	19474	19474		7622	7622		3241	3241
										ZGP -	0	0		-3346.83	-3346.83		-4056.67	-4056.67
										ZGP +	19474	19474		9635.83	9635.83		2434.67	2434.67
										Paper ZGP -	0	0		-3345.83	-3345.83		-4055.07	-4055.07
										Paper ZGP +	19474	19474		9636.83	9636.83		2436.27	2436.27
										AH-ZGP -	0	0		-1331	-1331		-1344.4	-1344.4
										AH-ZGP +	19474	19474		7622	7622		2906.67	2906.67
										Paper AH-ZGP -	0	0		-1013.22	-1013.22		-862.418	-862.418
										Paper AH-ZGP +	19474	19474		7613.16	7613.16		3239.78	3239.78
											CAS(5,6)+DDCI
											S=4.5			S = 3.5			S = 2.5
											1	2		2.25	3.25		3.5	4.5
										Ab Initio -	0	0		-2368	-2368		-1719	-1719
										Ab Initio +	15944	15944		7064	7064		2202	2202
										ZGP -	0	0		-2368	-2368		-2725.87	-2725.87
										ZGP +	15944	15944		8261.33	8261.33		2588.8	2588.8
										Paper ZGP -	0	0		-2966.67	-2966.67		-3683.73	-3683.73
										Paper ZGP +	15944	15944		7662.67	7662.67		1630.93	1630.93
										AH-ZGP -	0	0		-2368	-2368		-2946.2	-2946.2
										AH-ZGP +	15944	15944		7064	7064		1574.72	1574.72
										Paper AH-ZGP -	0	0		-1707.02	-1707.02		-1961.18	-1961.18
										Paper AH-ZGP +	15944	15944		7061.19	7061.19		2205.19	2205.19
											CAS(9,8)+DDCI
											S=4.5			S = 3.5			S = 2.5
											1	2		2.25	3.25		3.5	4.5
										Ab Initio -	0	0		-3123	-3123		-2225	-2225
										Ab Initio +	16478	16478		7036	7036		1667	1667
										ZGP -	0	0		-3123	-3123		-3898.27	-3898.27
										ZGP +	16478	16478		7862.33	7862.33		1594.4	1594.4
										Paper ZGP -	0	0		-3536.17	-3536.17		-4559.33	-4559.33
										Paper ZGP +	16478	16478		7449.17	7449.17		933.333	933.333
										AH-ZGP -	0	0		-3123	-3123		-4071.2	-4071.2
										AH-ZGP +	16478	16478		7036	7036		843.947	843.947
										Paper AH-ZGP -	0	0		-2214.92	-2214.92		-2728.76	-2728.76
										Paper AH-ZGP +	16478	16478		7036.45	7036.45		1674.61	1674.61

## Sheet: Reconstruction (csv)
0	0		-1705.24	-1705.24		-982.73	-982.73
18230.8	18230.8		8196.82	8196.82		3308.56	3308.56
16326.9	16326.9		6681.23	6681.23		4384.7	4384.7
16529.9	16529.9		6796.29	6796.29		4484.78	4484.78
0	0		-1705.24	-1705.24		-1512.99	-1512.99
18230.8	18230.8		10448.7	10448.7		4563.96	4563.96
0	0		-1705.29	-1705.29		-1860.11	-1860.11
18230.8	18230.8		8196.82	8196.82		2841.38	2841.38
0	0		-929.437	-929.437		-430.027	-430.027
11113.9	11113.9		5965.45	5965.45		2720.31	2720.31
10835	10835		5973.61	5973.61		3875.24	3875.24
11147.3	11147.3		6075.55	6075.55		4009.28	4009.28
0	0		-929.437	-929.437		-746.172	-746.172
11113.9	11113.9		6479.83	6479.83		2958.46	2958.46
0	0		-929.481	-929.481		-856.429	-856.429
11113.9	11113.9		5965.61	5965.61		2485.6	2485.6
0	0		-1786.86	-1786.86		-1126.09	-1126.09
17936.5	17936.5		7893.02	7893.02		3035.93	3035.93
16082.3	16082.3		7231.09	7231.09		4211.55	4211.55
16278.2	16278.2		7355.8	7355.8		4297.36	4297.36
0	0		-1786.86	-1786.86		-1663.21	-1663.21
17936.5	17936.5		10170.8	10170.8		4315.63	4315.63
0	0		-1786.82	-1786.82		-2010.6	-2010.6
17936.5	17936.5		7893.02	7893.02		2583.79	2583.79
0	0		-1031.75	-1031.75		-537.677	-537.677
11660.1	11660.1		6082.14	6082.14		2677.47	2677.47
11242.7	11242.7		6292.16	6292.16		3789.07	3789.07
11547.6	11547.6		6405.13	6405.13		3916.83	3916.83
0	0		-1031.75	-1031.75		-873.453	-873.453
11660.1	11660.1		6741.68	6741.68		3013.26	3013.26
0	0		-1031.75	-1031.75		-1006.51	-1006.51
11660.1	11660.1		6082.14	6082.14		2425.83	2425.83
0	0		-1768.09	-1768.09
14962.2	14962.2		7195.16	7195.16
13492.8	13492.8		6027.7	6027.7
13745.5	13745.5		6174.3	6174.3
0	0		-1768.09	-1768.09		-1831.46	-1831.46
14962.2	14962.2		8206.72	8206.72		3155.94	3155.94
0	0		-1768.09	-1768.09		-2024.25	-2024.25
14962.2	14962.2		7195.16	7195.16		2282.44	2282.44
